# Supplementary material for: Theoretical Insights on ORR Activity of Sn-N-C Single-Atom Catalysts
Source: MDPI journal article supplement (doi:10.3390/molecules28145571), 2023-07-21
Supplement: s1 [file s1]

# Theoretical Insights on ORR Activity of Sn-N-C Single-Atom Catalysts

Yuhui Zhang<sup>a</sup>, Boyang Li<sup>b</sup> and Yaqiong Su<sup>b,\*</sup>

<sup>a</sup> School of Energy and Chemical Engineering, Xiamen University Malaysia, Sepang 43900, Malaysia

<sup>b</sup> School of Chemistry, Engineering Research Center of Energy Storage Materials and Devices of Ministry of Education, National Innovation Platform (Center) for Industry-Education Integration of Energy Storage Technology, Xi'an Jiaotong University, Xi'an, 710049, China

\* Correspondence: **authors:** yqsu1989@xjtu.edu.cn (Y. Su)

**Table S1.** The binding energy of SnN<sub>4</sub>, SnN<sub>4</sub>-H, Sn-gra.

| Entry | Samples             | E <sub>b</sub> (eV) |
|-------|---------------------|---------------------|
| 1     | SnN <sub>4</sub>    | -5.85               |
| 2     | SnN <sub>4</sub> -H | -4.82               |
| 3     | Sn-gra              | -0.89               |

**Table S2.** The values of Gibbs free energy corrections used for the DFT calculation of non-absorbed gas-phase molecules.

| Gas              | E(DFT)/eV | TS/eV | CvT/eV | ZPE/eV | G/eV   |
|------------------|-----------|-------|--------|--------|--------|
| H <sub>2</sub>   | -6.76     | 0.05  | 0.03   | 0.29   | -6.49  |
| H <sub>2</sub> O | -14.25    | 0.13  | 0.05   | 0.59   | -13.73 |

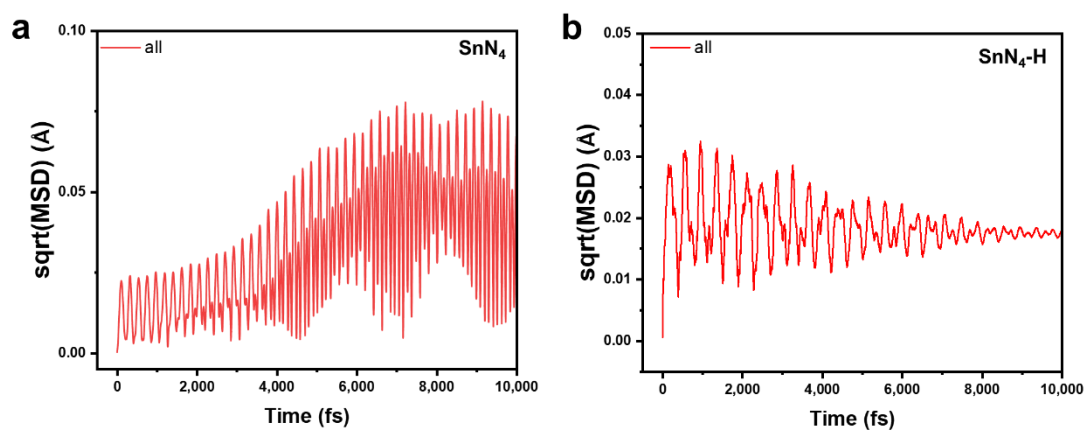

**Figure S1.** The RMSD of SnN<sub>4</sub> system and Sn-N atoms (a) and SnN<sub>4</sub>-H system and Sn-N atoms (b).

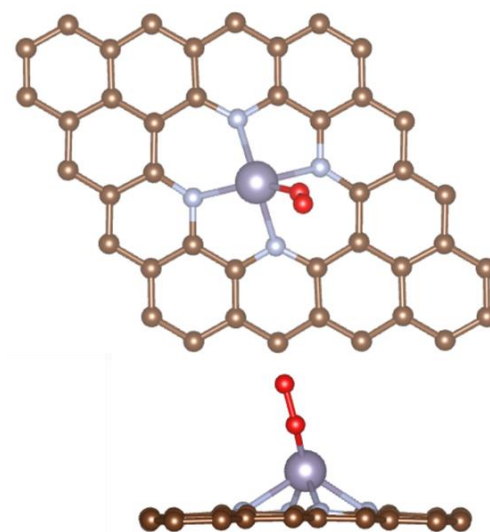

**Figure S2.** The corresponding O<sub>2</sub> adsorption structure of SnN<sub>4</sub>.

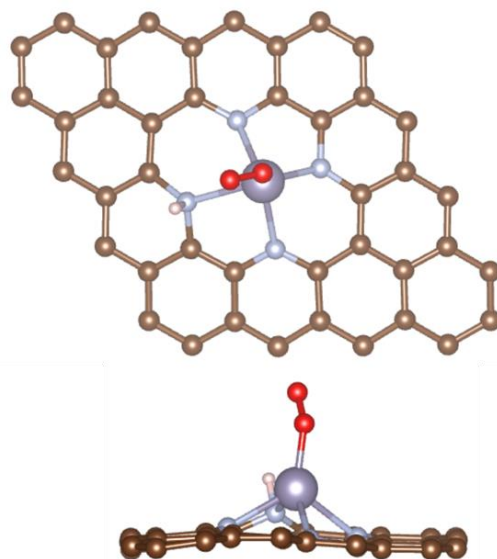

**Figure S3.** The corresponding O<sub>2</sub> adsorption structure of SnN<sub>4</sub>-H.

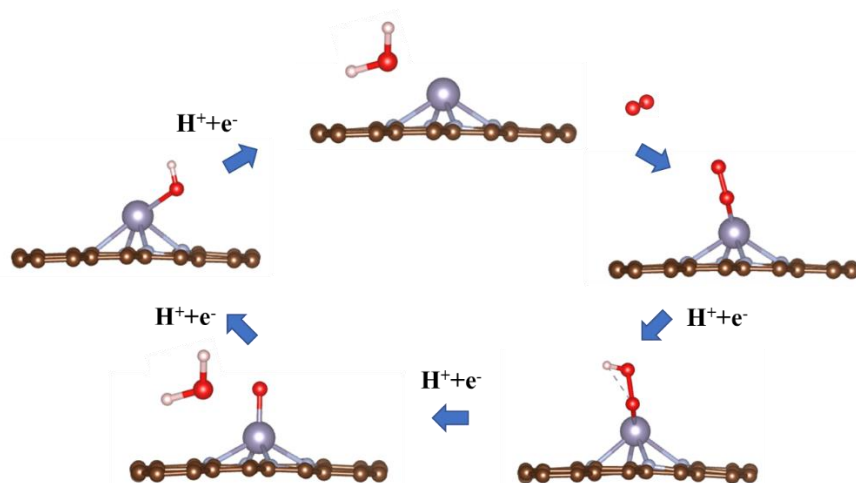

**Figure S4.** The reaction pathway of the associative four-electron SnN<sub>4</sub>.

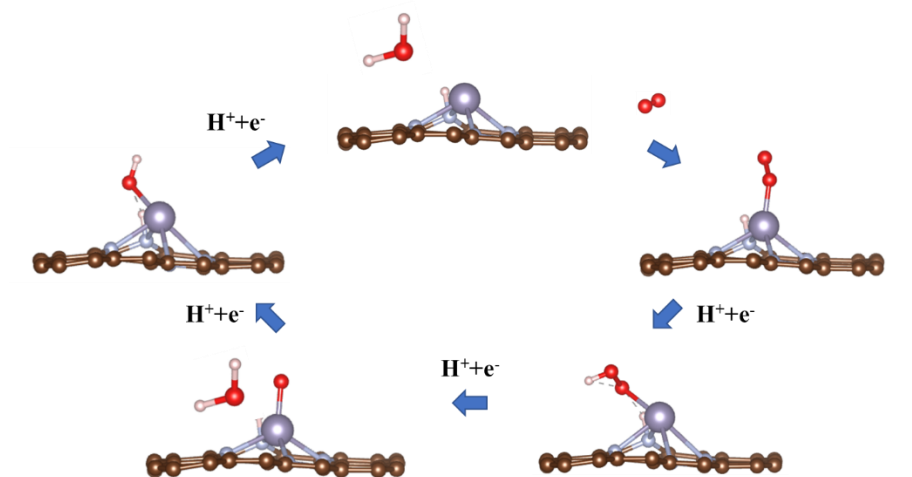

**Figure S5.** The reaction pathway of the associative four-electron  $\text{SnN}_4\text{-H}$ .
